# Supplementary material for: Electron transfer from wheel to axle in a rotaxane. A mass spectrometric investigation
Source: Royal Society of Chemistry journal article supplement (doi:10.1039/b9nj00501c), 2009-11-25
Supplement: b9nj00501c.pdf [file b9nj00501c.pdf]

Supplementary Material (ESI) for New Journal of Chemistry  
This journal is © The Royal Society of Chemistry and  
The Centre National de la Recherche Scientifique, 2009  
Electronic Supporting Information for:

## **Electron transfer from wheel to axle in a rotaxane. A mass spectrometric investigation**

**Sara Pasquale,<sup>a</sup> Stefano Di Stefano\*<sup>a</sup> and Bernardo Masci.\*<sup>a</sup>**

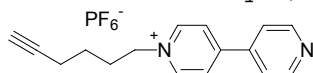

4

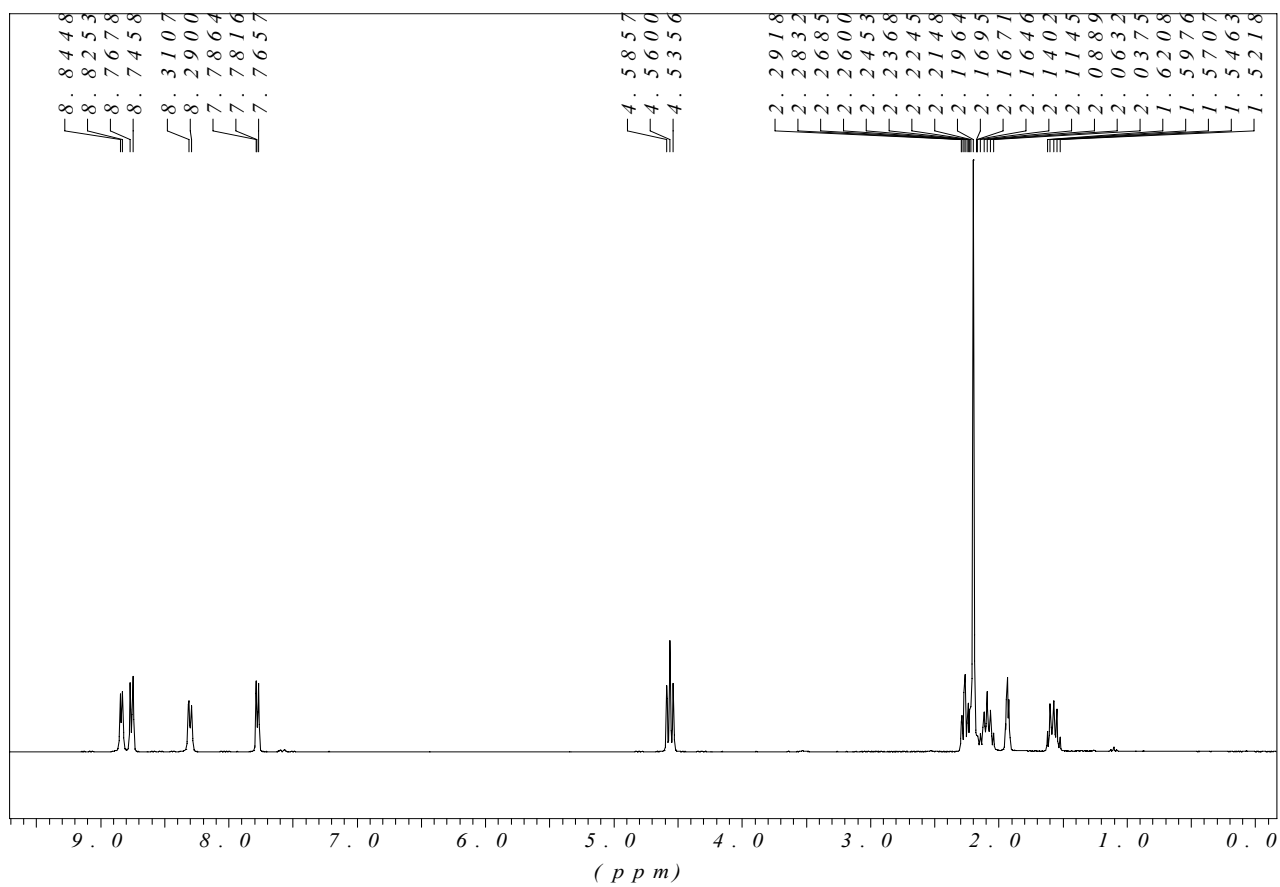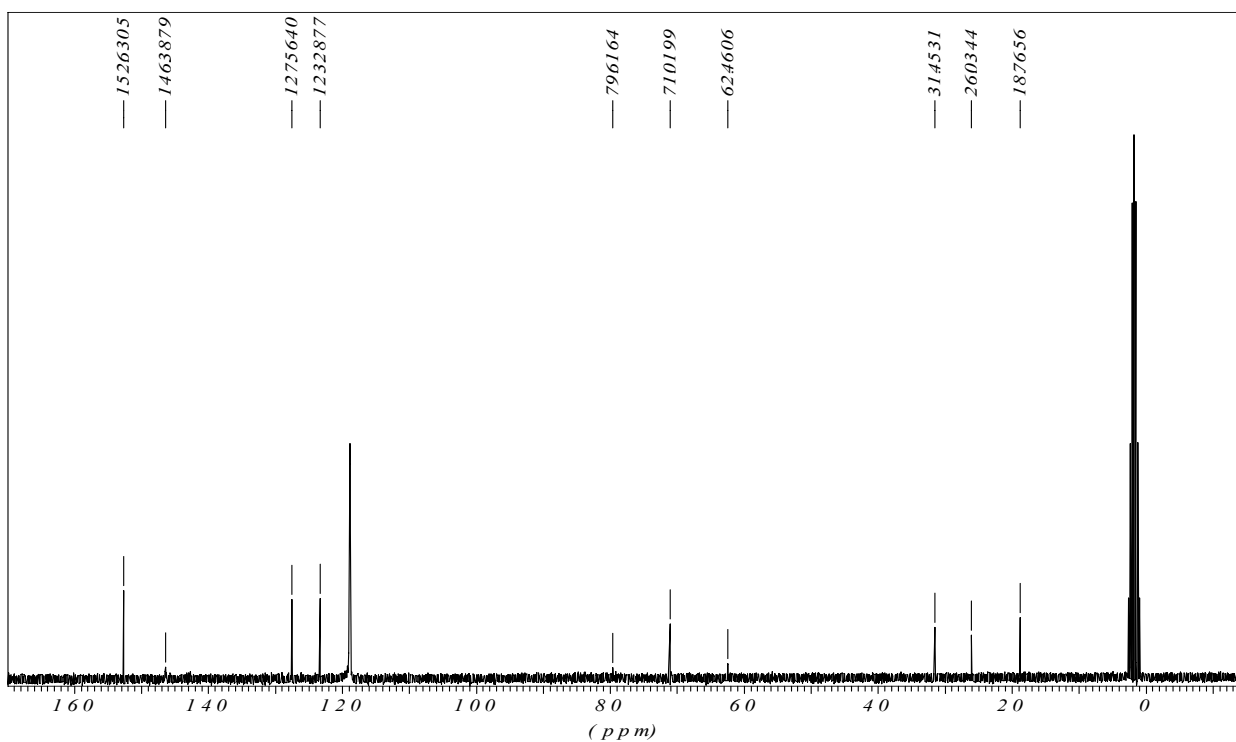

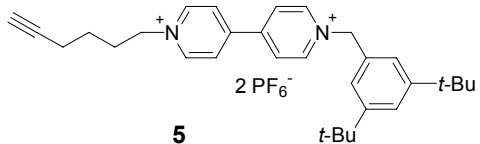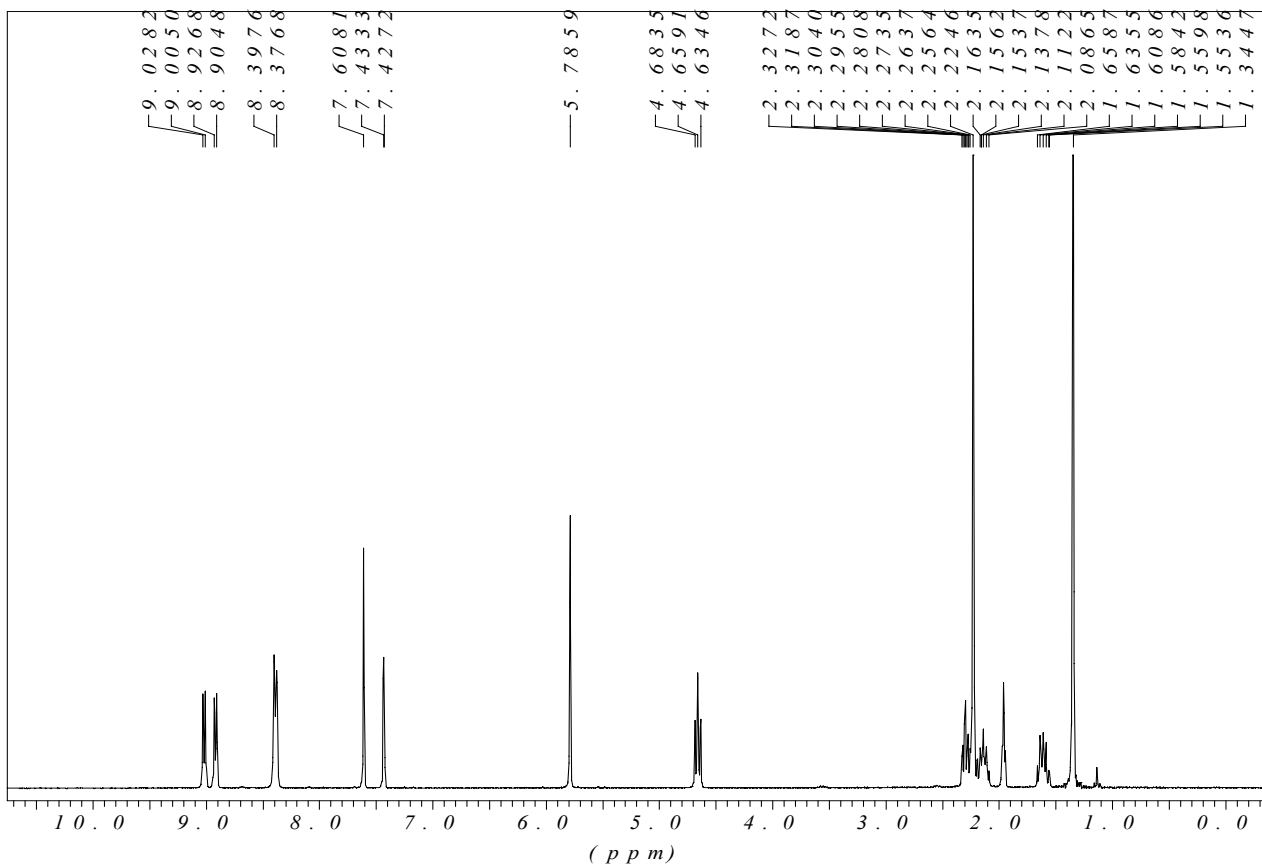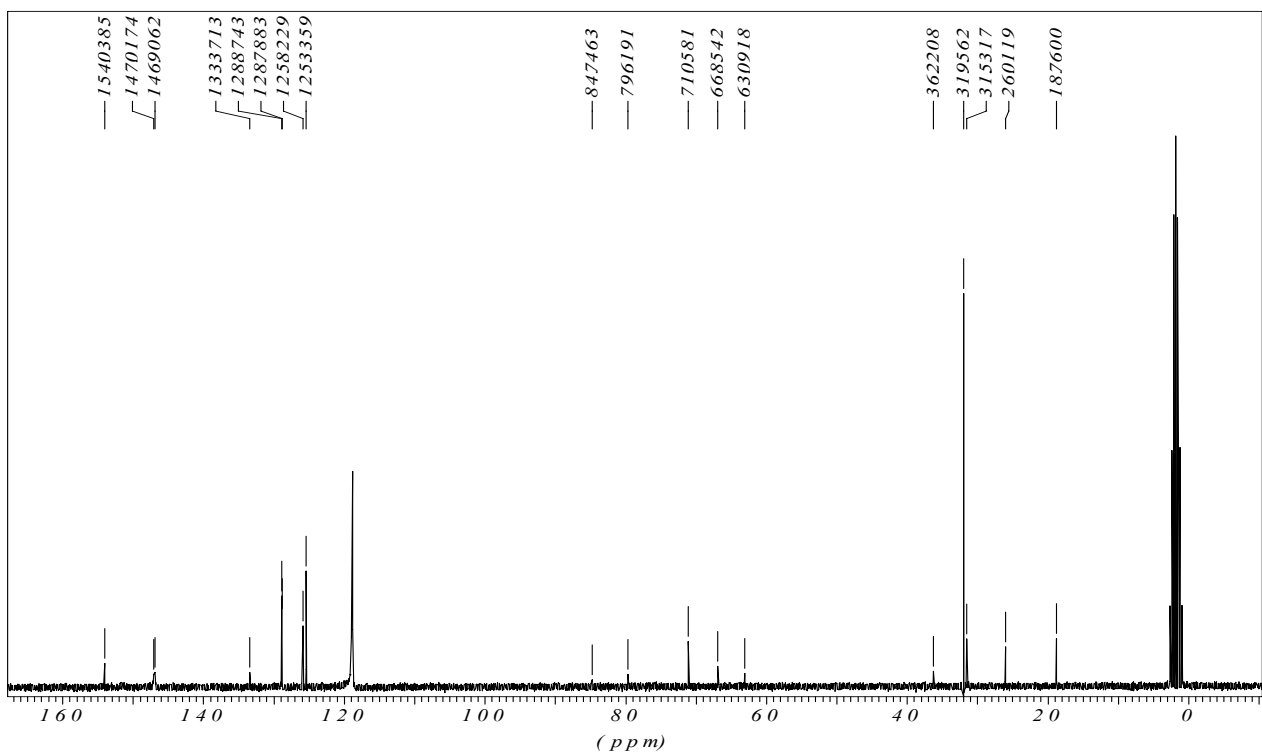

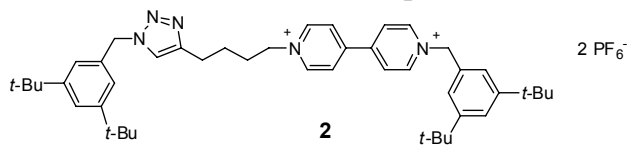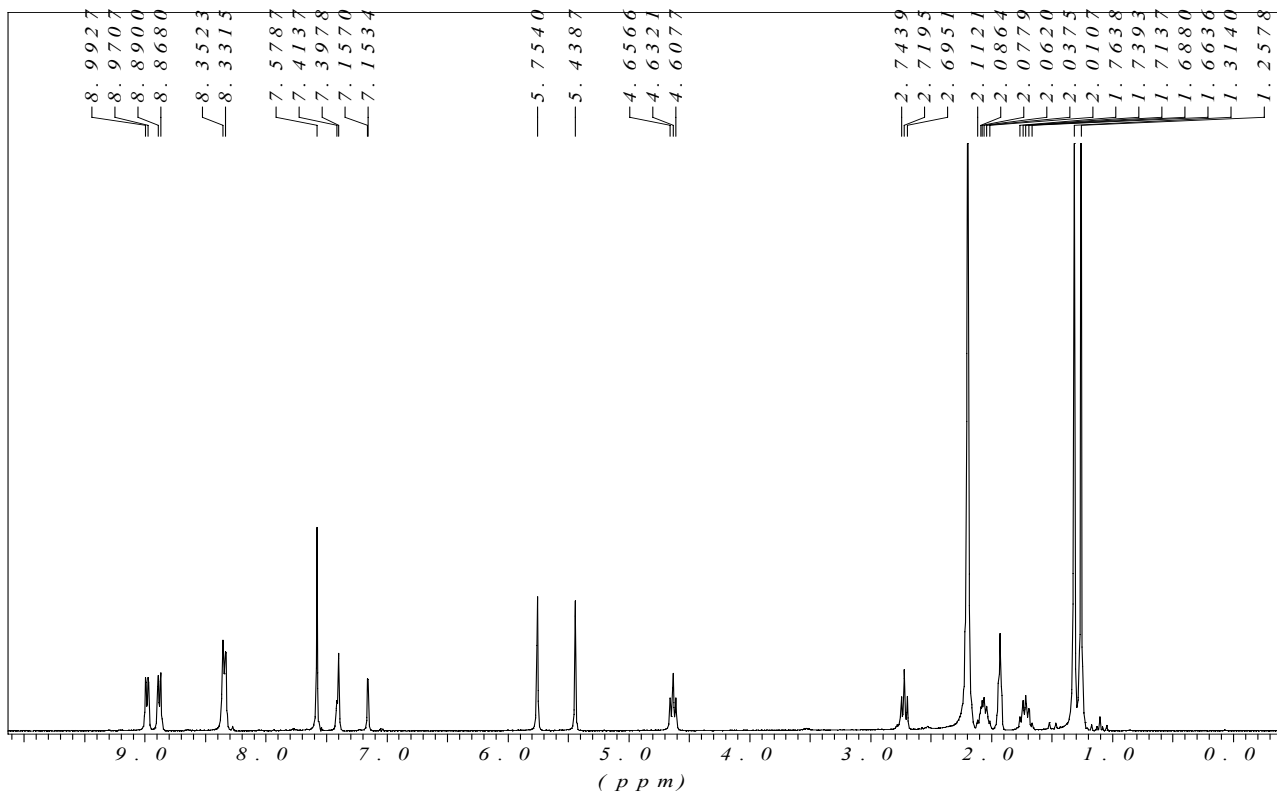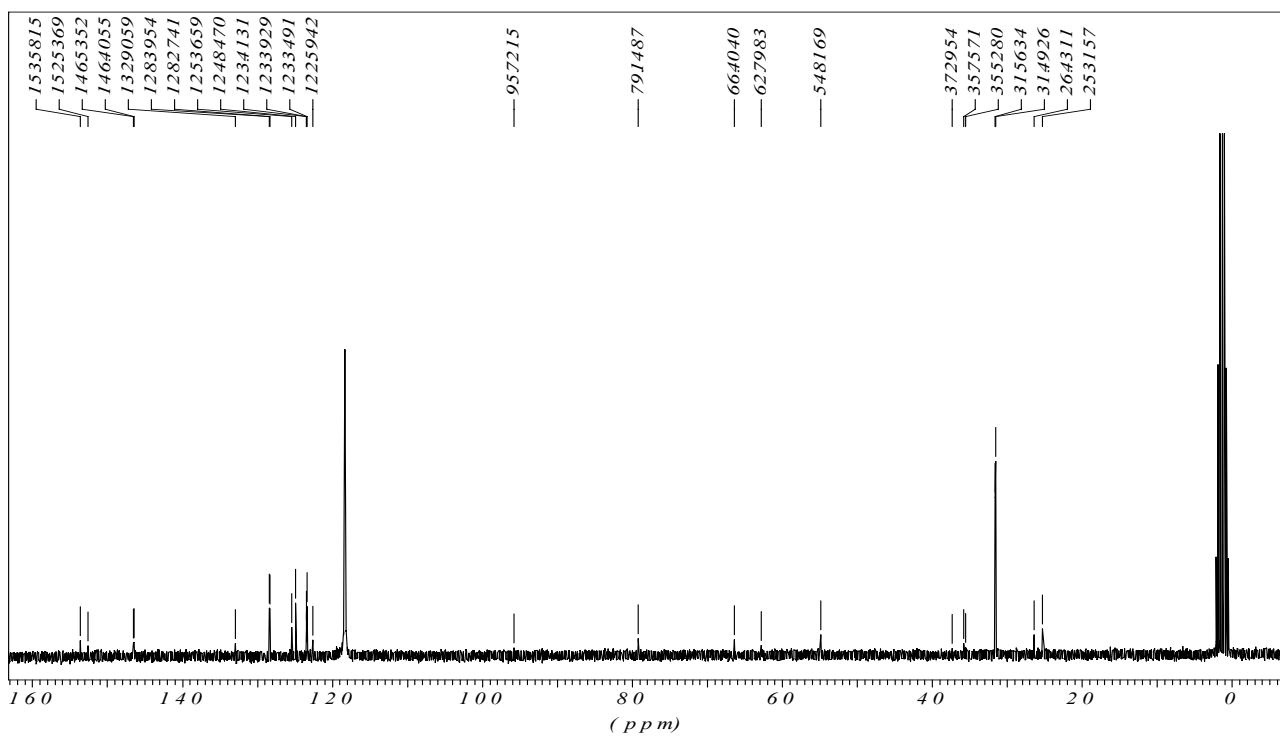

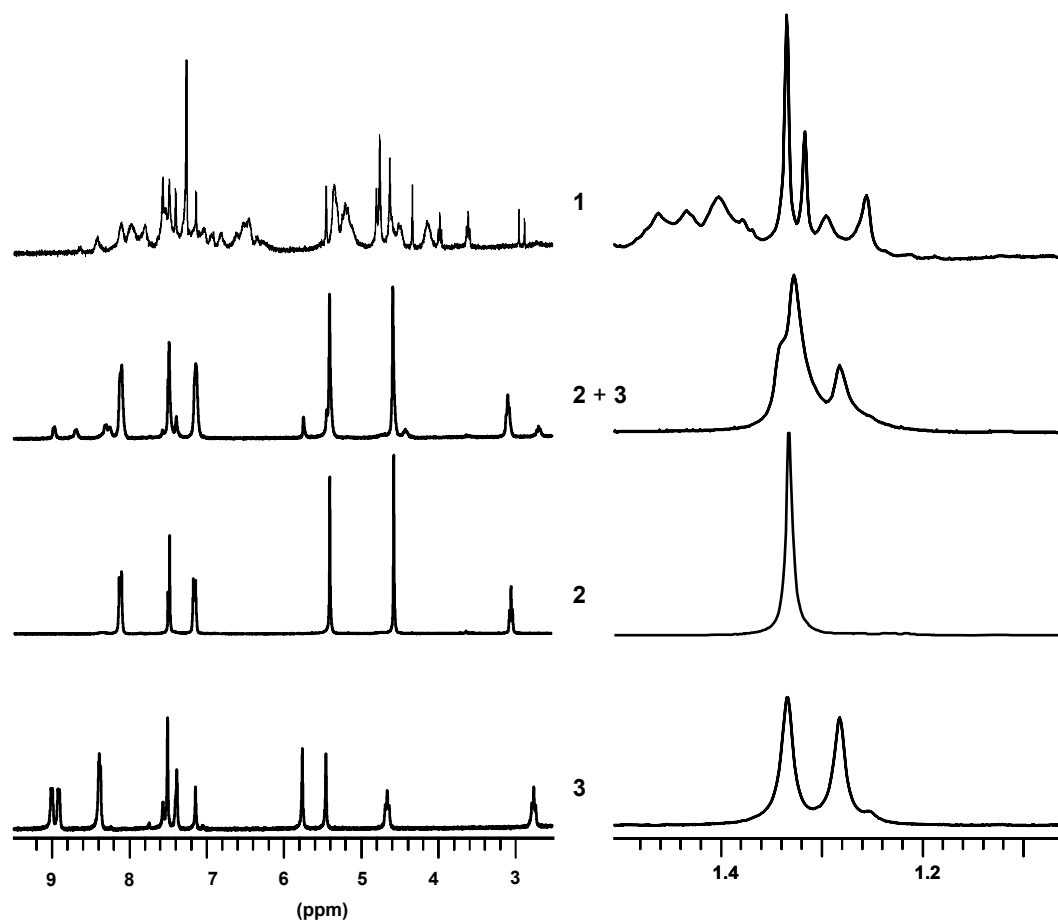

**Fig. E1** Spectra of the axle **3**, the wheel **2**, the rotaxane **1** and a mixture of **2 + 3** (1 mM and 2 mM respectively) in  $\text{CD}_3\text{CN}/\text{CDCl}_3$  1:1 at 298 K; two spectral regions are shown (on different scales).

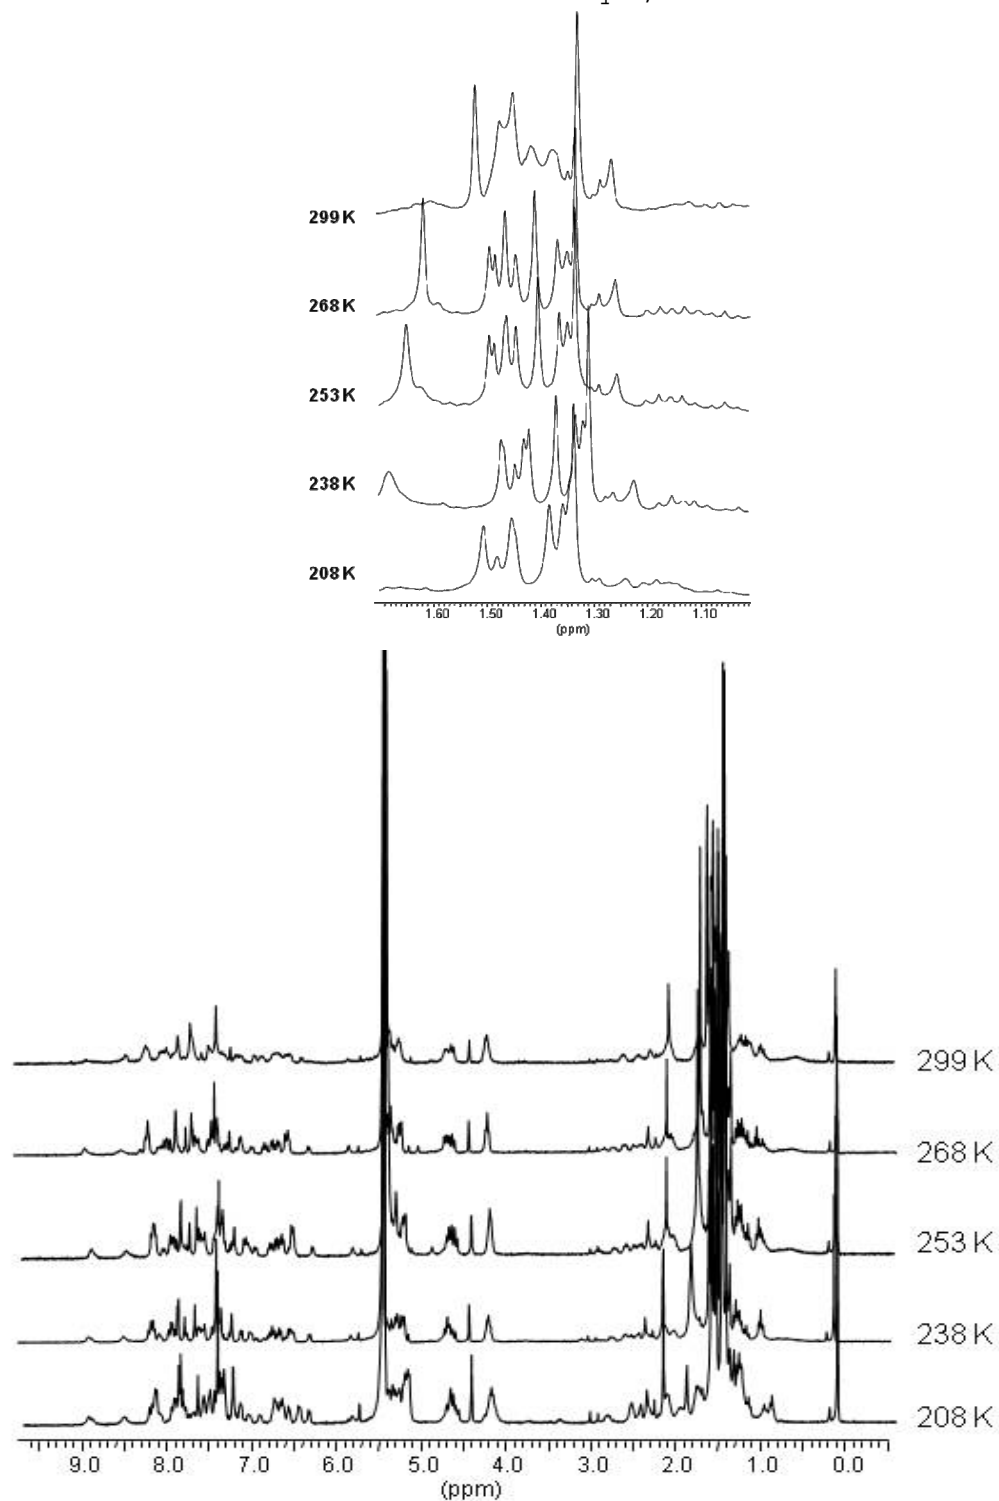

**Fig. E2** Spectra of rotaxane **1** in CD<sub>2</sub>Cl<sub>2</sub> at low temperatures. In the inset the enlarged region of *t*-Bu protons is shown.

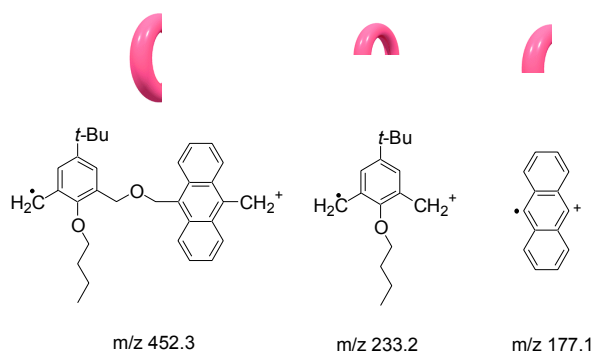

**Fig. E3** Proposed structure of the observed fragments from the wheel **2** in the MS MS/CID spectra of threaded and unthreaded adducts with alkyloviologen dications.
